# Supplementary material for: Quantifying the Chemical Composition and Real-Time Mass Loading of Nanoplastic Particles in the Atmosphere Using Aerosol Mass Spectrometry
Source: PubMed Central journal article supplement (PMC10882961; doi:10.1021/acs.est.3c10286), 2024-02-08
Supplement: es3c10286_si_001.pdf [file es3c10286_si_001.pdf]

## SUPPORTING INFORMATION

### Quantifying the Chemical Composition and Real-time Mass Loading of Nanoplastic

#### Particles (NPPs) in the Atmosphere using Aerosol Mass Spectrometry

Sining Niu<sup>1</sup>, Ruizhe Liu<sup>1,†</sup>, Qian Zhao<sup>2</sup>, Sahir Gagan<sup>1</sup>, Alana Doderio<sup>1</sup>, Qi Ying<sup>3</sup>, Xingmao Ma<sup>3</sup>, Zezhen Cheng<sup>2</sup>, Swarup China<sup>2</sup>, Manjula Canagaratna<sup>4</sup>, Yue Zhang<sup>1\*</sup>

<sup>1</sup>*Department of Atmospheric Sciences, Texas A&M University, College Station, Texas, 77843, USA*

<sup>2</sup>*Environmental Molecular Sciences Laboratory, Pacific Northwest National Laboratory, Richland, Washington, 99354, USA*

<sup>3</sup>*Department of Civil and Environmental Engineering, Texas A&M University, College Station, Texas, 77843, USA*

<sup>4</sup>*Aerodyne Research Inc., Billerica, Massachusetts, 01821, USA*

<sup>†</sup>*Now at the School of Earth and Atmospheric Sciences, Georgia Institute of Technology, Atlanta, Georgia, 30332, USA*

January 2024

*Environmental Science and Technology*

*\*Corresponding author: Yue Zhang, [yuezhang@tamu.edu](mailto:yuezhang@tamu.edu)*

No. of pages: 28

No. of figures: 14

No. of tables: 2

## 1 **1. Aerosol Mass Spectrometry and Potential Aerosol Mass reactor operation**

### 2 **conditions**

3 The Aerosol Mass Spectrometry (AMS) is the main instrument for collecting the mass  
4 spectra of the nanoplastic particles in this study. Due to the aerodynamic lens and the chopper,  
5 the AMS samples particles 10 million times more efficient than sampling gases.<sup>1</sup> Other  
6 statistical tools, including the PMF, are used to further aid the data analysis of complicated  
7 particle mass spectra collected from the AMS and described in Section S2 below.

8 The Potential Aerosol Mass (PAM) reactor is a horizontal 13 L copper cylindrical  
9 chamber (46 cm long × 22 cm inner diameter) operated in continuous flow mode, and could  
10 be used to generate Secondary Organic Aerosols (SOA) from Volatile Organic Compounds  
11 (VOCs) with either the ozonolysis or photooxidation pathways.<sup>2,3</sup> In this study, the SOA  
12 particles are formed in the absence of any seed particles through OH radical or ozone oxidation.  
13 Regarding OH radical oxidation, a 1 liter-per-minute (LPM) purified compressed air passing  
14 through the deionized water was introduced into the PAM for the humidification. Another 1.5  
15 LPM air flow was introduced into the homebuilt ozone generator and then entered the PAM.  
16 The VOC precursors were introduced into the PAM via the syringe pump injection into a three-  
17 neck round-bottom flask, which was carried out by a 1 LPM compressed air flow to the PAM.  
18 The OH radicals were generated via the photolysis of ozone with UV lamps in the PAM. In  
19 addition, 1 LPM flow of ozone was introduced into the PAM and the ozonolysis was conducted  
20 under the dry condition. The UV lights in the PAM were turned off and the ozonolysis was the  
21 predominated reaction under dark condition to form low volatile oxidation products, which  
22 then undergo self-nucleation to form SOA particles.

### 23 **2. Positive matrix factorization (PMF) working principle**

24 PMF was first introduced in 1994 by Paatero and Tapper,<sup>4</sup> and has been a useful tool  
25 for resolving the time series data for mass spectrometer. The fundamental principle in PMF

26 analysis is that the measured data matrix of mass spectrum could be expressed by the  
27 combination of selected number of factors based on mass conservation.<sup>5</sup> The organic data  
28 matrix *org* with the dimensions  $t \times m$  is modelled according to Eq. S1:

$$29 \quad org_{i,j} = \sum_{p=1}^P ts_{ip}ms_{pj} + e_{ij} \quad (S1)$$

30 where P is the number of factors in the solution,  $org_{i,j}$  is the signal of ion fragment j at time  
31 step i in the organic data matrix,  $ts_{ip}$  is the concentration of factor p at the given time step i,  
32  $ms_{pj}$  is the fraction of ion fragment j in the mass spectrum for the particular factor p, and  $e_{ij}$   
33 is the residual not included by the solution for ion fragment j at time step i. With a given factor  
34 number, the PMF solution provides a minimum summation of the weighted squared residuals  
35 Q as indicated by Eq. S2 below:

$$36 \quad Q = \sum_{i=1}^t \sum_{j=1}^m (e_{ij}/\sigma_{ij})^2 \quad (S2)$$

37 where  $\sigma_{ij}$  is the estimated errors corresponding to the  $org_{i,j}$ . As the Q value also depends on  
38 the dimensions of the data matrix and the number of factors chosen, normalizing the Q value  
39 with the expected Q value ( $Q_{exp}$ ), which is the degree of freedom of the solution, leads to a  
40 useful diagnostic. The absolute  $Q/Q_{exp}$  value could be influenced by the unknown modelled  
41 uncertainties, wrongly chosen number of factors, etc., and consequently, monitoring how the  
42  $Q/Q_{exp}$  varies among different iterations could assist in assessing the optimal solution.<sup>6</sup>

43 Ions with signal-to-noise ratio (S/N) lower than 0.2 were removed, and the ions with  
44 S/N between 0.2 and 2 were downweighed by increasing the estimated error values.<sup>5,7</sup> The  
45 PMF solutions with one to ten factors are evaluated in this study. To further explore how  
46 rotation and the random starting point would influence the uncertainty of the solutions,  
47 different FPeak (from -1 to +1, step: 0.1), and SEED values (from 1 to 10, step: 1) were  
48 adapted, as described by Zhang et al.<sup>8</sup>

### 49 **3. Detailed analysis procedures of ME-2**

50 As mentioned in the main text section 2.3, ME-2 allows for solution of S1 while using  
 51 a prior information about component mass spectra or time series. In this work we utilize a  
 52 reference input profile for the PS mass spectrum with a scalar  $a$  value that determines the extent  
 53 to which the derived factor profile could vary from the input spectrum profile.<sup>6,9</sup> The  $a$  value  
 54 spans from 0 to 1 with an increment of 0.1, while the lower the  $a$  value, the more rigorous the  
 55 constraint is. For example, if  $a = 0.1$ , for the profile of the extracted factor, the intensity of all  
 56 the ions could vary as much as  $\pm 10\%$  compared with the input reference spectrum. The ME-  
 57 2 with the  $a$  value approach could provide a more complete exploration of the rotational  
 58 ambiguity of the solution space.<sup>6</sup>

#### 59 4. The relative ionization efficiency (RIE) of polystyrene nanoplastic particles

60 To develop the calibration curve of pure polystyrene (PS) nanoplastic particles (NPP),  
 61 a mixing condensation particle counter (CPC, Model 1720, Brechtel) was deployed together  
 62 with AMS. The aerosols generated are split into two lines for AMS and the CPC, and the  
 63 detected ion rate in Hz (I) from AMS could be calibrated with the CPC measurements.<sup>10,11</sup> The  
 64 AMS ion signal was compared with the input number of molecules derived from the CPC  
 65 particle number concentration and an assumed collection efficiency of 1 to obtain the ionization  
 66 efficiency.

67 With ammonium nitrate as the standard, the relative ionization efficiency (RIE) for PS  
 68 particles can be derived by comparing the ionization efficiency of the PS and ammonium nitrate.  
 69 The detailed equation to calculate RIE is described in Eq. S1, Eq. S2, and Eq. S3 below:<sup>10</sup>

$$70 \quad C_S = \frac{10^{12} MW_S}{IE_S Q N_A} \sum_{all\ i} I_{S,i} \quad (S\ 1)$$

$$71 \quad \frac{IE_S}{MW_S} = RIE_S \frac{IE_{NO_3}}{MW_{NO_3}} \quad (S2)$$

$$72 \quad C_S = \frac{10^{12} MW_{NO_3}}{RIE_S IE_{NO_3} Q N_A} \sum_{all\ i} I_{S,i} \quad (S3)$$

73 where the  $C_S$  is the mass concentration of the PS particles in this study,  $Q$  is the  
 74 volumetric sample flow rate in  $\text{cm}^3 \text{s}^{-1}$ ,  $N_A$  is Avogadro number, and  $\sum_{all\ i} I_{S,i}$  is the summation

75 of the detected ion rate in Hz for all fragment ions.  $IE_s$  and  $MW_s$  are the ionization efficiency  
76 and molecular weight of the PS particles, respectively, and the  $IE_{NO_3}$  and  $MW_{NO_3}$  represent the  
77 ionization efficiency and molecular weight of nitrate, respectively. The molecular weight of  
78 polystyrene cancels out by combining Eqns. (S1) and (S2) to derive Eqns. (S3).

79 To further test the reproducibility of the decomposition products of PS NPPs, the  
80 correlation values of the five mass spectra of PS NPPs collected during the five points  
81 calibration was calculated and plotted in Figure S4 below, and it shows nearly identical mass  
82 spectra. Besides, during the calibration experiment, the background blank samples were tested.  
83 Below in Figure S5, S6, S7 show the AMS mass spectra collected during the nitrate calibration,  
84 filtering period and the time series of tracer ions during the filtering period, which are 16 and  
85 14 times lower than ambient-derived concentrations, respectively.

## 86 **5. The comparison of PS NPPs quantification with the AMS and pyrolysis-GC/MS**

87 To further validate the quantification of PS NPPs with the AMS, the pyrolysis GC-MS  
88 analysis was also conducted following the established method.<sup>12</sup> PS NPPs standard were  
89 collected by the AMS and onto a glass fiber filter (Cytiva, 0.7  $\mu\text{m}$  particle retention)  
90 simultaneously with 2 liter per minute flow rate for 77 minutes.

91 The pyrolysis GC-MS method was calibrated with the mass of PS NPP standards  
92 ranging from 0.5 to 5  $\mu\text{g}$  with the method established in previous study.<sup>12</sup> Briefly, the standards  
93 were first injected in the pyrolysis chamber. Pyrolysis was performed at 700  $^{\circ}\text{C}$  for 1 min, and  
94 thermodesorption was performed at 300  $^{\circ}\text{C}$  for 1 min. Gas phase pyrolysis products were  
95 injected directly into a Shimadzu GCMS-QP2020NX (Shimadzu Corporation, Kyoto, Japan)  
96 equipped with an RTX-1 capillarity column (30 m, 0.25 mm i.d., 25  $\mu\text{m}$  film thickness). Column  
97 flow was 1.1 mL/min with helium as the carrier gas at a split ratio of 5. The injection port  
98 temperature was set at 310  $^{\circ}\text{C}$ . GC oven started at 50  $^{\circ}\text{C}$  for 2 min and ramped to 180  $^{\circ}\text{C}$  at 15  
99  $^{\circ}\text{C}/\text{min}$ , increased to 310  $^{\circ}\text{C}$  at 5  $^{\circ}\text{C}/\text{min}$ , and hold at 310  $^{\circ}\text{C}$  for 44 mins. Mass spectrometry

100 scanned from 50 to 600 m/z range with ion source temperature at 200 °C and interface  
101 temperature at 280 °C. As shown below in Figure S8, the peak (~5 min) on the total ion  
102 chromatogram (TIC) shows mass pattern matching to Styrene, a monomer of PS.<sup>13</sup> The instrument  
103 and membrane filter blanks do not show this PS peak on their chromatogram. The areas of the PS  
104 peak (~5 min) on the TIC showed a linear relationship with the spiking masses, ( $R^2 > 0.999$ ).  
105 The linear relationship indicates the feasibility of quantification for PS MPs in test samples.

106 Two replicated sets of 16 circular pieces (1.9 mm diameter) with a total area of 0.454  
107 cm<sup>2</sup> were cropped from the sample filter. Given that the effective filter area is 7.55 cm<sup>2</sup>, the  
108 mass of PS in each set of 16 circular pieces was projected to the mass of PS in the whole  
109 sampling filter by multiplying 16.63 (the ratio of the sample area to the measured area). Each  
110 set of 16 circular filter pieces was analyzed on a pyrolysis probe (CDS 6200, CDS Analytical,  
111 LLC, Oxford, PA, USA) with the same pyrolysis and GC/MS methods from above. The mass  
112 of PS NPPs in the 16 pieces of filter circles was estimated to be 0.57 μg, which corresponding  
113 to 9.45 μg of PS collected on the filter and 61.36 μg/m<sup>3</sup> in the air sample measured by  
114 Pyrolysis-GC/MS. The mass concentration during the sampling time quantified by the AMS  
115 was 60.78 μg/m<sup>3</sup>. The difference of PS concentration quantified by the AMS and the Pyrolysis-  
116 GC/MS is shown to be 2%, further validating an accurate quantification of PS NPPs with the  
117 AMS.

## 118 **6. The second ambient sampling**

119 The time series data for organic aerosols during the *ambient2* sampling period is shown  
120 in Figure S14. Applying similar analysis procedures to *ambient1*, the best ME-2 solution for  
121 *ambient2* sampling period has 3 factors, and they are identified as constrained PS factor, more-  
122 oxidized OOA (MO-OOA), and hydrocarbon like organic aerosols (HOA). Again, the MO-  
123 OOA factor has a higher  $f_{44}$  and O:C, and the HOA factor contains ions that have been  
124 identified as markers of fresh fossil fuel combustion, including  $C_nH_{2n-1}^+$  and  $C_nH_{2n+1}^+$ .<sup>14, 15</sup>

## 125 **7. ME-2 analysis of synthetic data matrix**

126 To further validate the ability of ME-2 to quantify the concentration of ambient PS  
127 NPPs, the organic data matrix was modified before reapplying the ME-2 analysis. First, all the  
128 ME-2 derived factors were summed up except the extracted PS factor. The ME-2 analysis with  
129 the synthetic organic data matrix as input did not extract any meaningful PS factor, as the 10-  
130 minute moving average concentration has always been lower than the detection limit (12 ng/m<sup>3</sup>  
131 for 10 minutes). Second, the PS section in the original organic matrix was substituted with a  
132 fraction of the PS factor extracted by the original ME-2 analysis. 50%, 10%, 5%, and 2% of  
133 the original PS factor were added to the organic matrix generated by summing all factors except  
134 the original PS factor, and the ME-2 analysis was reapplied. The averaged PS concentration  
135 derived from the ME-2 analysis with the synthetic data matrix during the intentional injection  
136 period was 51%, 9%, 4%, and 2% of the original PS factor derived with the actual ambient  
137 data matrix with their absolute mass loading in the table S1. The additional ME-2 analysis  
138 successfully extracted a PS factor of around 16 ng/m<sup>3</sup>, which is lower than the averaged  
139 concentration derived by the ME-2 for ambient sampling (30 ± 20 ng/m<sup>3</sup>). Such results further  
140 validate the quantification of ambient PS NPPs with AMS and ME-2 analysis.

## 141 **8. The concentration of airborne microplastic particles from literatures**

142 In previous studies, the concentration of atmospheric microplastic particles was  
143 reported in various units across different geographical areas. Herein, this section illustrates the  
144 conversion of the previously reported concentrations into ng/m<sup>3</sup>, which is the unit of  
145 measurement utilized in the present study, to provide a uniform basis for comparison. The  
146 majority of prior research quantified the microplastics in terms of number concentration, i.e.  
147 count per cubic meter.<sup>16,17,18,19</sup> By assuming a sphere for the collected microplastics, with the  
148 density and the midpoint of the reported size, the mass concentration of microplastics are  
149 derived from the number concentration. Another study reported the concentration of

150 microplastics as a percentage of the total particles collected,<sup>20</sup> and considering our sampling  
151 site, a total organic concentration of  $6 \mu\text{g}/\text{m}^3$ , which is the averaged concentration measured  
152 during the sampling, is adopted for the derivation in the present study.

### 153 **9. Concentration of PS nanoplastic particles derived from the tracer ions**

154 As described in section 3.4, to further validate the feasibility of using tracer ions to  
155 derive the abundance of PS nanoplastic particles, the concentrations from ME-2 and tracer ions  
156 are assessed. The concentration is calculated based on the normalized intensity of the tracer  
157 ion among the mass spectrum of the pure PS particle standard with the Eq. S4 below:

$$158 \quad [\text{PS}] = [\text{C}_8\text{H}_8^+]/0.06 \quad (\text{S4})$$

159 where [PS] is the concentration of PS nanoplastic particles in  $\mu\text{g}/\text{m}^3$ ,  $[\text{C}_8\text{H}_8^+]$  is the  
160 concentration of  $\text{C}_8\text{H}_8^+$  in  $\mu\text{g}/\text{m}^3$ , and 0.06 is the normalized intensity of  $\text{C}_8\text{H}_8^+$  for the mass  
161 spectrum of PS NPP standard.

162



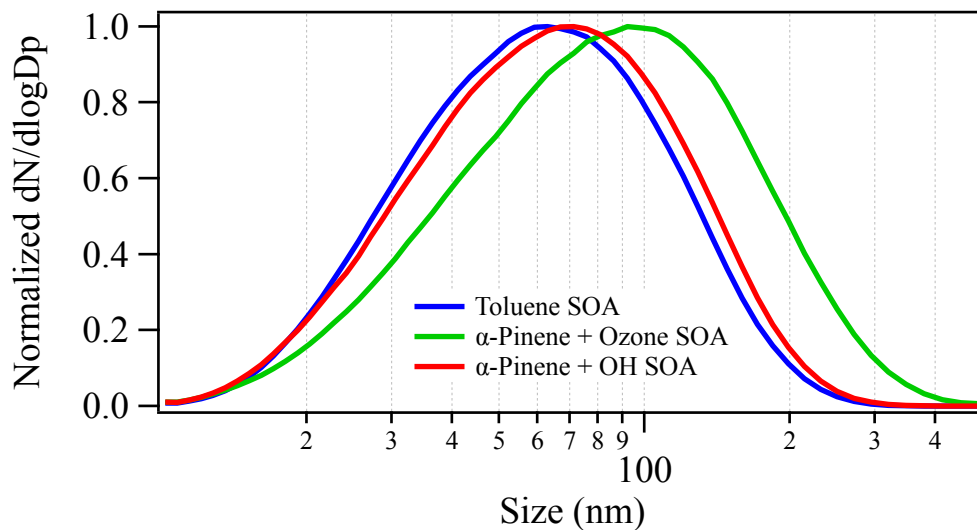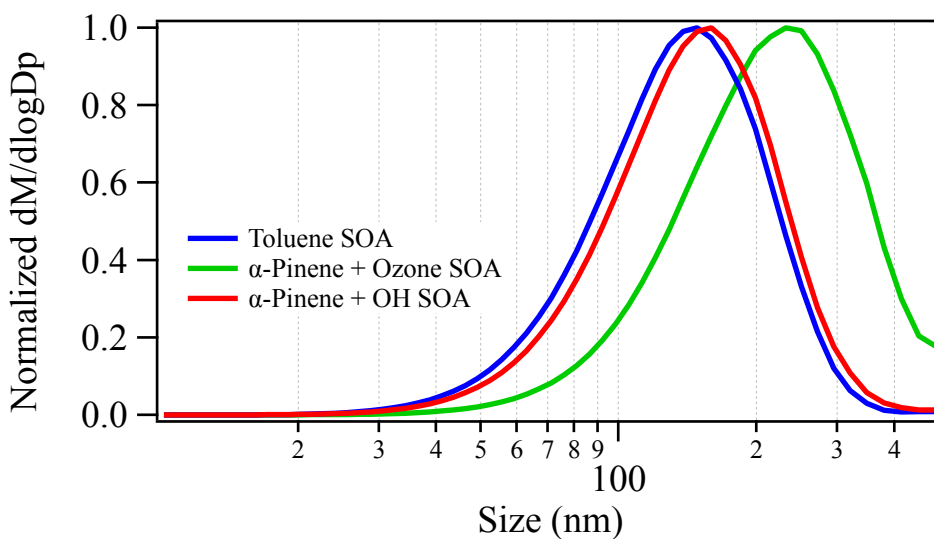

167 **Figure S1:** The normalized number and mass distribution of self-nucleated SOAs generated  
 168 through PAM.

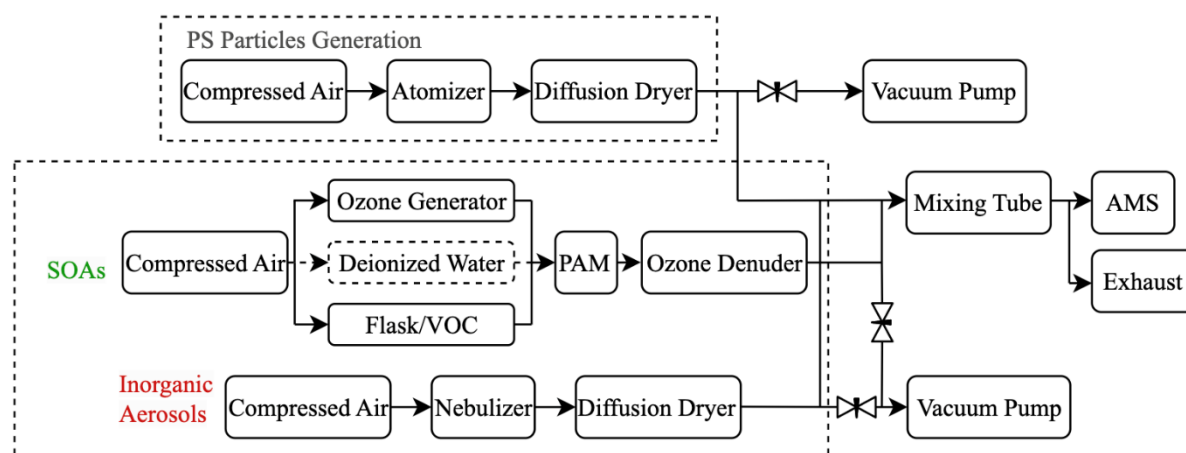

170 **Figure S2.** Experiments setup for the mixing of PS particles and SOAs/inorganic aerosols.

171 The top part of the setup demonstrated the PS particles generation, and the bottom part shows

172 the SOAs and inorganic aerosols generation. For the SOAs generation, deionized water

173 line is only used during the OH radical oxidation pathway, whereas this line is replaced by

174 pure air during the ozonolysis pathway.

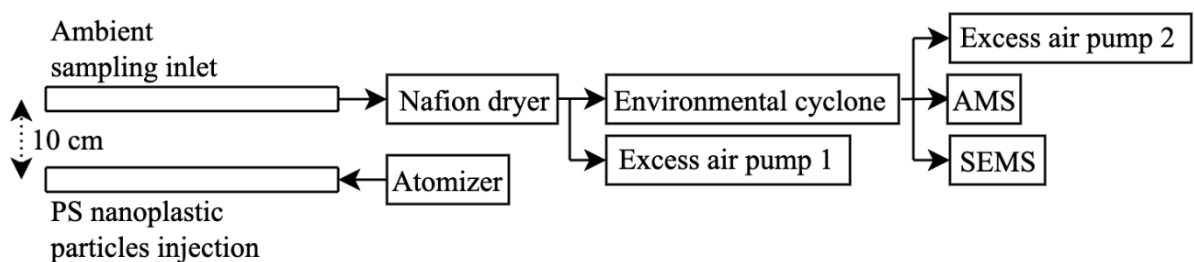

175 **Figure S3.** Schematic of ambient sampling setup. The excess air pump 1 drew 5 LPM of air  
 176 to reduce wall loss of the submicron particles. The excess air pump 2 drew 1.6 LPM of air, to  
 177 ensure the total flow passing through the environmental cyclone to be 2 liter per minute with  
 178 a size cut of 1  $\mu\text{m}$ .

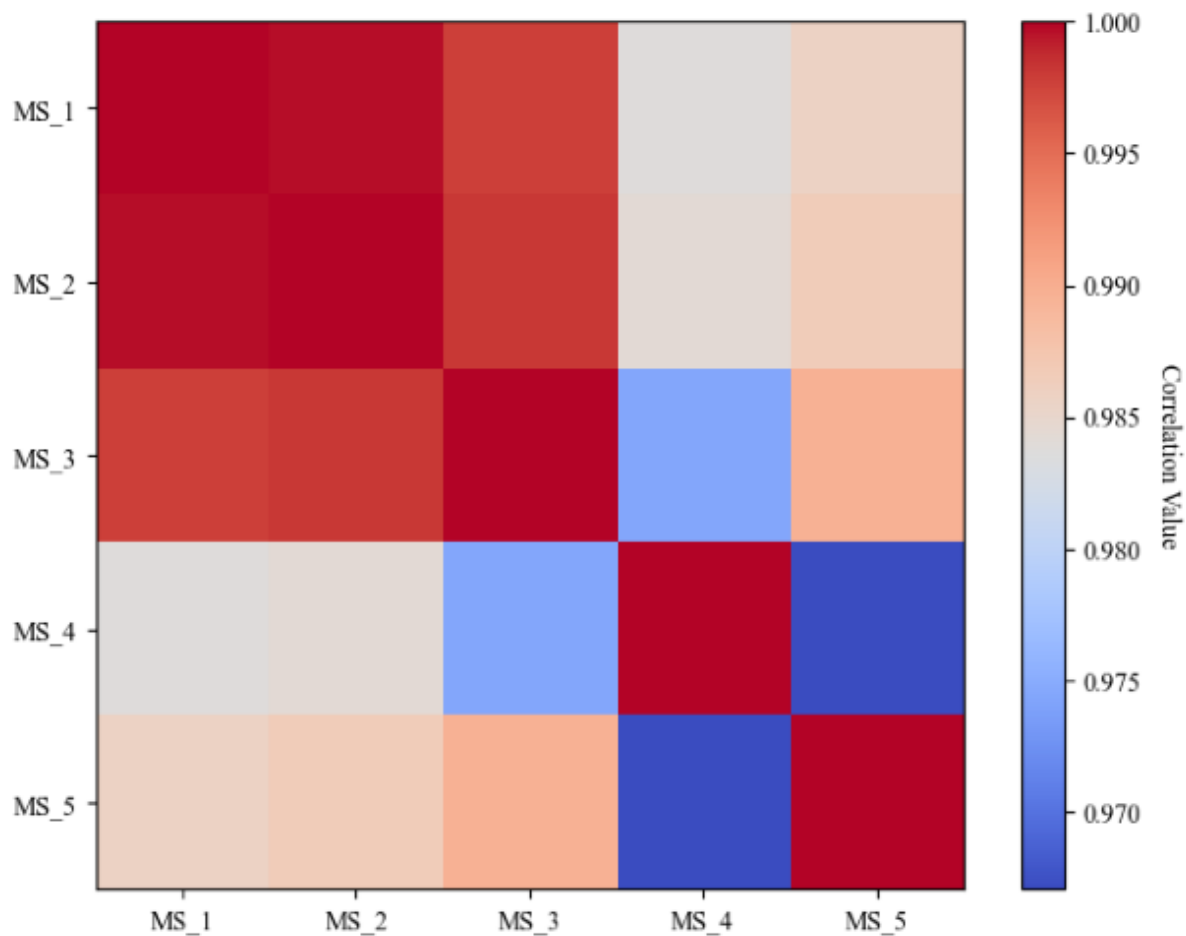

179

180 **Figure S4.** The Pearson's correlation heatmap of the five mass spectra of PS NPPs collected

181 during the five-point calibration (MS\_1 to MS\_5).

182

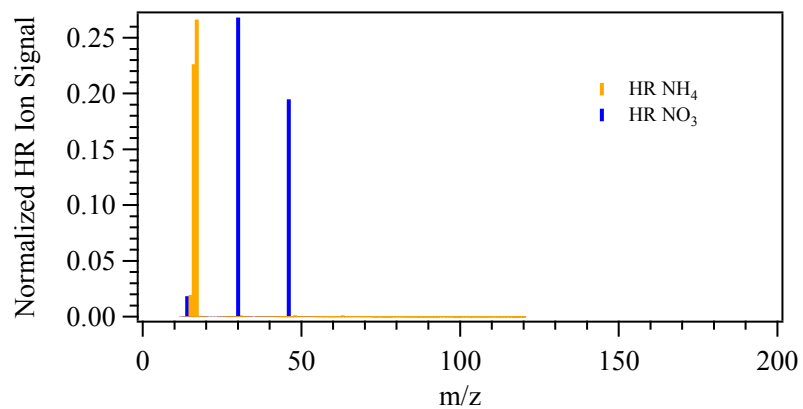

183

184 **Figure S5.** The mass spectrum of ammonium nitrate collected by the HR-ToF-AMS during

185 the calibration procedures.

186

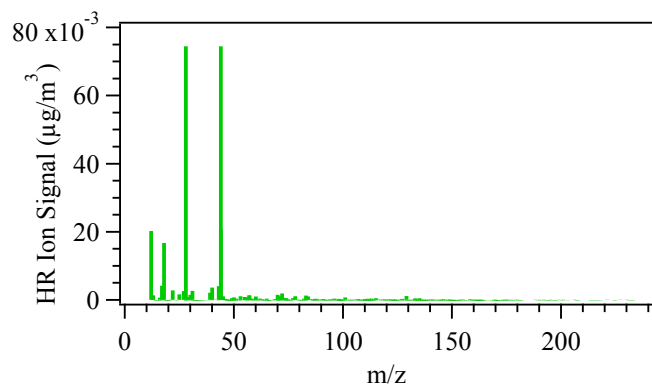

187

188 **Figure S6.** The mass spectrum collected from the HR-ToF-AMS when there was a filter

189 installed at the inlet.

190

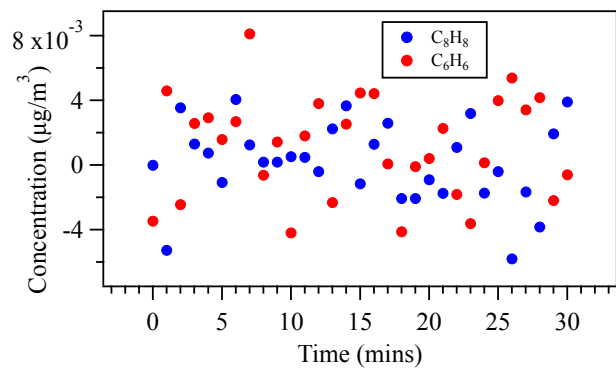

191

192 **Figure S7.** The derived concentrations of the tracer ions of PS NPPs when a filter was

193 installed at the inlet of the HR-ToF-AMS.

194

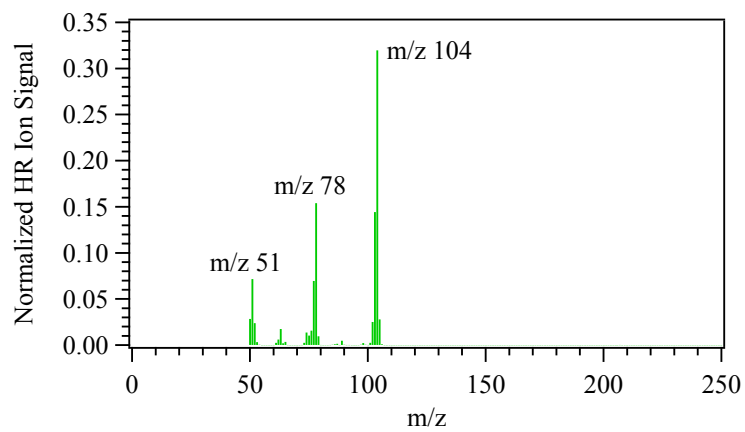

195

196 **Figure S8.** Pyrolysis-GC/MS mass spectrum for pure PS NPPs.



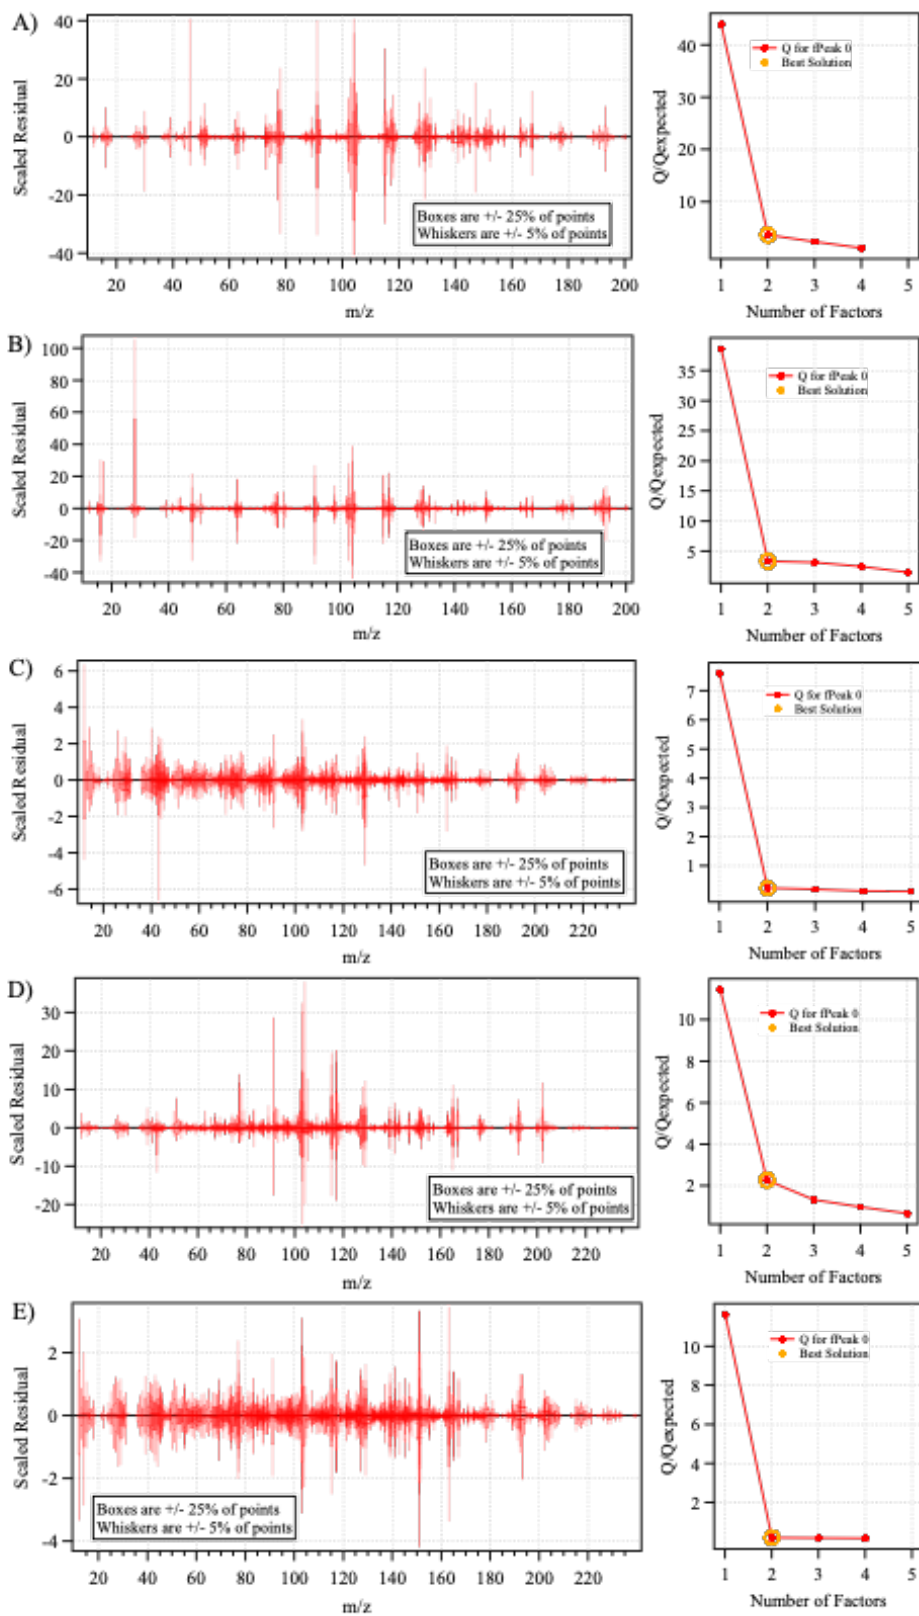

197 **Figure S9.** The scaled residual for the HR ions with two factors (right) and  $Q/Q_{\text{exp}}$  for the  
 198 solution with different number of factors for different aerosol mixtures. A) ammonium

- 199 nitrate; B) ammonium sulfate; C) toluene with ozonolysis; D)  $\alpha$ -pinene with ozonolysis and
- 200 OH oxidation; E)  $\alpha$ -pinene with ozonolysis.

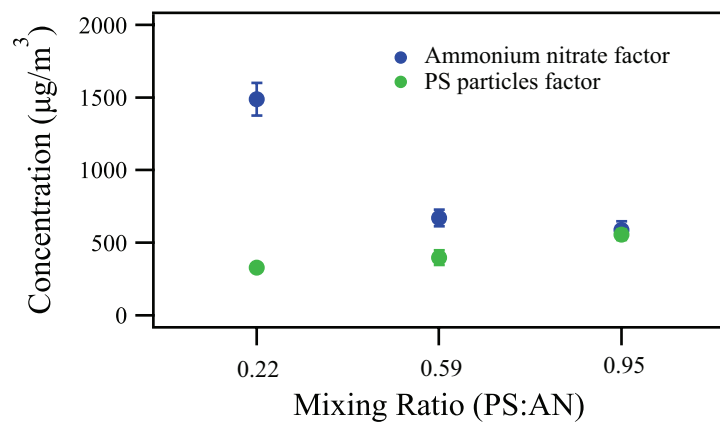

201 **Figure S10.** The time series of the two factors extracted by PMF for the mixture of PS  
202 nanoplastic particles and ammonium nitrate inorganic aerosols.

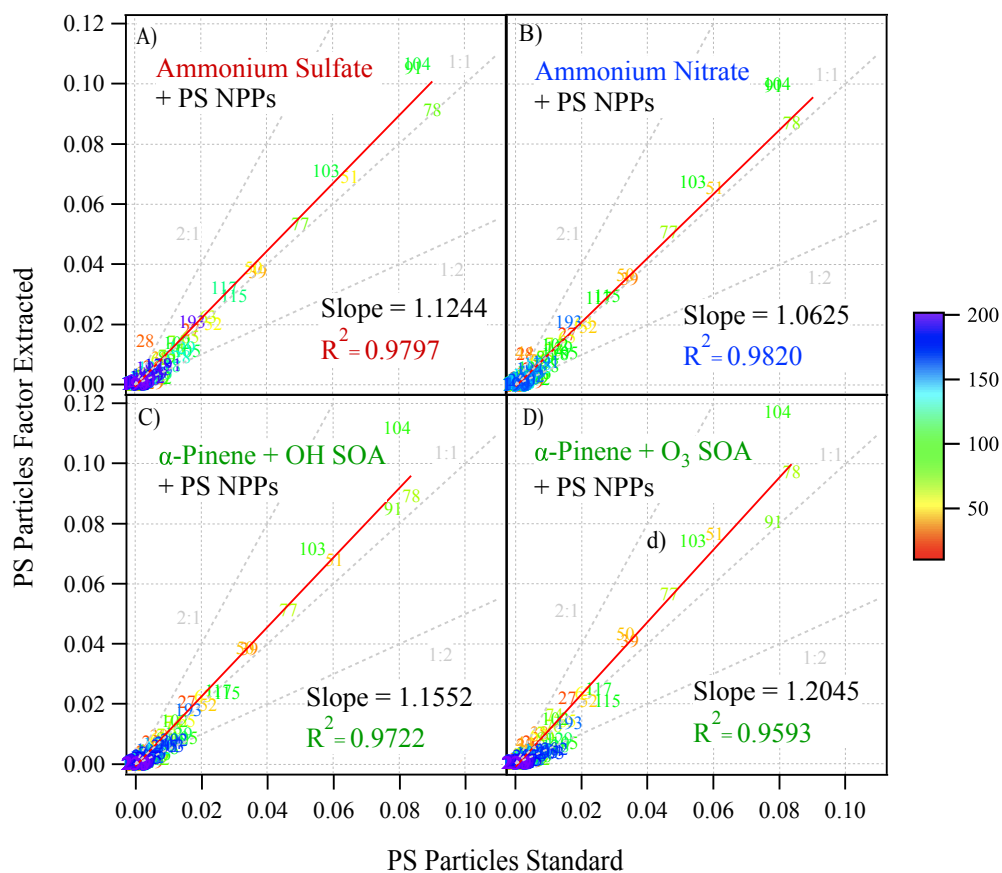

203 **Figure S11.** Scatter plots of normalized HR organic ion signal of PS particles from the factor  
 204 extracted from PMF (y axis) of the four binary mixture systems versus the pure PS standard  
 205 (x axis). The four binary mixtures are PS particles mixed with particles comprised of A)  
 206 ammonium sulfate; B) ammonium nitrate; C)  $\alpha$ -pinene SOA from OH oxidation and  
 207 ozonolysis; D)  $\alpha$ -pinene SOA from ozonolysis alone. The color bar represents the m/z from  
 208 the mass spectrum in the order from low to high values.

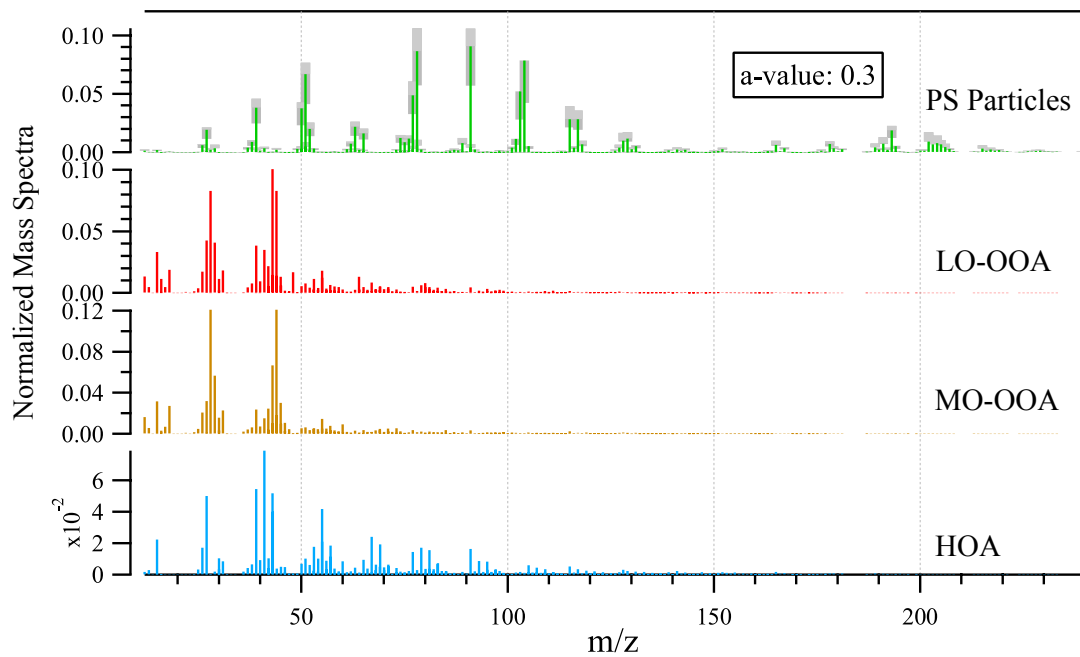

209

210 **Figure S12.** The normalized mass spectra (pr nor) of each factor identified during ambient1

211 from the ME-2 analysis. The grey shaded areas denote the uncertainty of the mass spectra

212 with an  $a$ -value = 0.3.

213

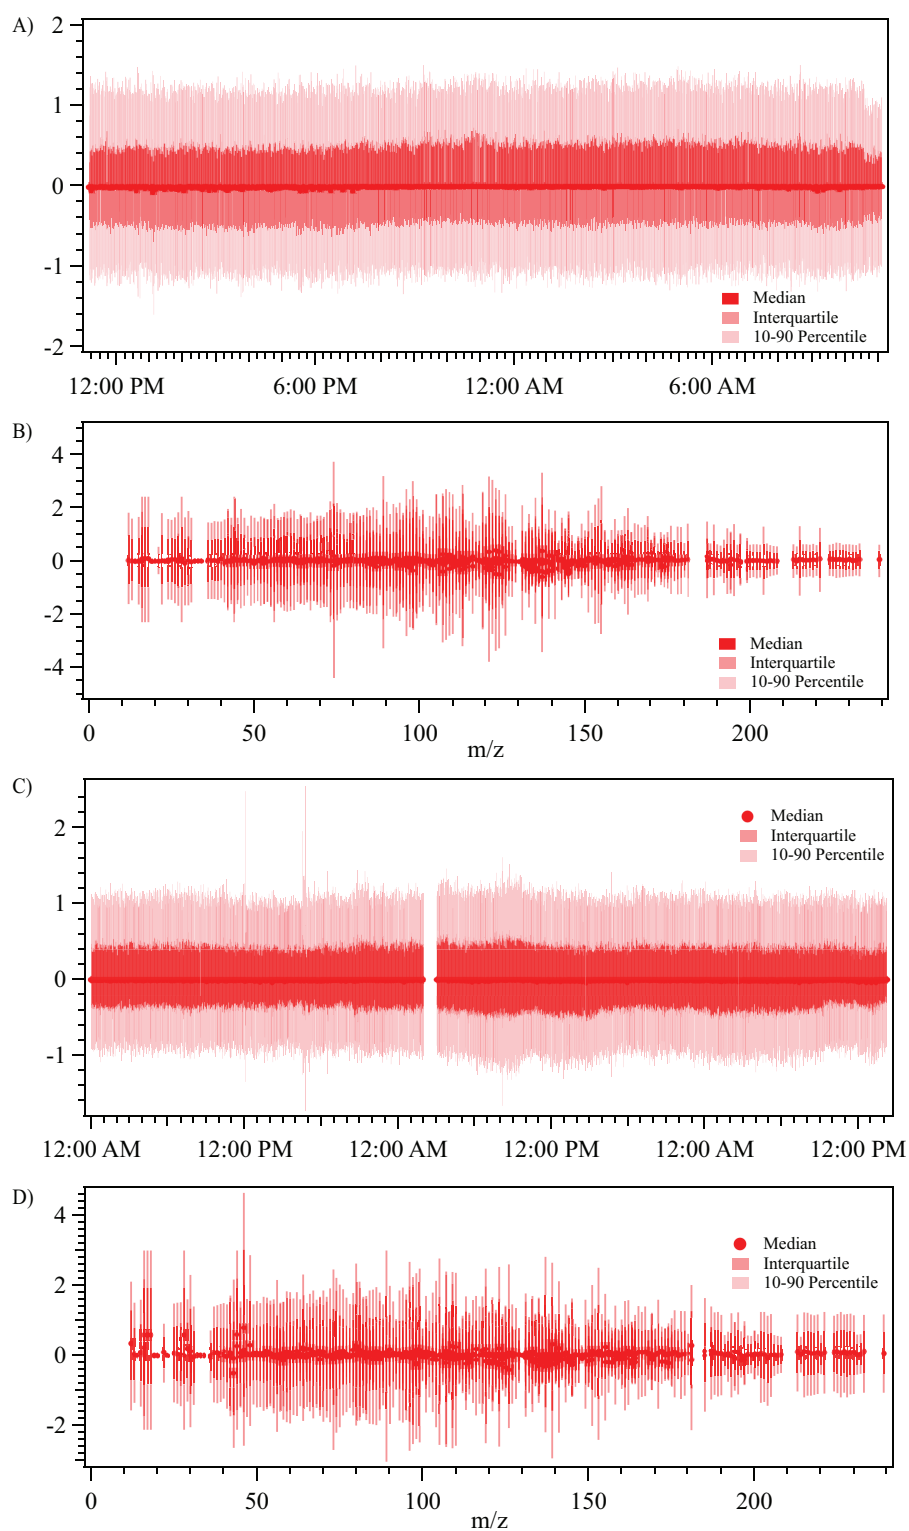

214 **Figure S13.** The scaled residual for ambient samplings among the sampling time (A, C) and  
 215 mass spectrum (B, D) to demonstrate optimum solution is achieved with minimum residual.  
 216 While A and B are for *ambient1* and C and D are for *ambient2*.

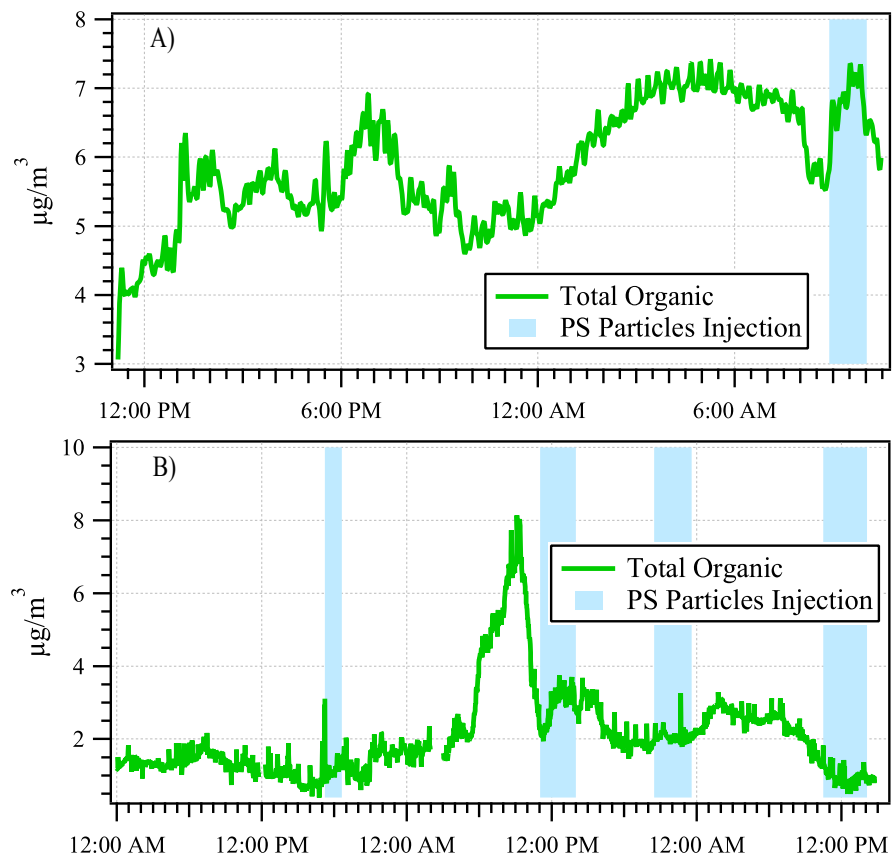

217 **Figure S14.** The time series of total organic concentration during *ambient1* (A) and *ambient2*  
 218 (B) sampling.

219 **Table S1.** The ratio of the PS factor added to the synthetic organic data matrix for ME-2  
220 analysis to the total PS factor derived from the original ME-2 analysis, the ratio of the PS  
221 factor derived from the corresponding ME-2 analysis to the total PS factor derived from the  
222 original ME-2 analysis, and the averaged mass loading of the PS factor derived from the  
223 corresponding ME-2 analysis during the intentional injection period.

| Fraction of the PS factor added | Fraction of the PS factor derived | Averaged mass loading (ng/m <sup>3</sup> ) |
|---------------------------------|-----------------------------------|--------------------------------------------|
| 100%                            | NA                                | 654                                        |
| 50%                             | 51%                               | 333                                        |
| 10%                             | 9%                                | 61.5                                       |
| 5%                              | 4%                                | 26.9                                       |
| 2%                              | 2%                                | 16.2                                       |

224

225



226 **Table S2.** The averaged mass concentration and standard deviation of PS NPPs during  
227 specific period and their corresponding p value from t-test. The 4-6 pm indicate the  
228 background period, and the rest are the color-coded period in Figure 4A.

229

| Time                                    | 4-6 pm                | 7-9 pm                | 9-11 pm                | 2-5 am                 | 5-7 am                 |
|-----------------------------------------|-----------------------|-----------------------|------------------------|------------------------|------------------------|
| Mean Conc. ( $\mu\text{g}/\text{m}^3$ ) | $1.55 \times 10^{-2}$ | $1.78 \times 10^{-2}$ | $4.08 \times 10^{-2}$  | $4.05 \times 10^{-2}$  | $4.17 \times 10^{-2}$  |
| SD                                      | $4.79 \times 10^{-3}$ | $7.27 \times 10^{-3}$ | $8.31 \times 10^{-3}$  | $7.80 \times 10^{-3}$  | $5.96 \times 10^{-3}$  |
| p value                                 | NA                    | $4.44 \times 10^{-3}$ | $1.54 \times 10^{-76}$ | $2.34 \times 10^{-79}$ | $8.66 \times 10^{-98}$ |

230

231

232 **References**

- 233 (1) Drewnick, F.; Hings, S. S.; Alfarra, M. R.; Prevot, A. S. H.; Borrmann, S. Aerosol  
234 quantification with the Aerodyne Aerosol Mass Spectrometer: detection limits and ionizer  
235 background effects. *Atmos Meas Tech* **2009**, *2* (1), 33-46.
- 236 (2) Lambe, A. T.; Ahern, A. T.; Williams, L. R.; Slowik, J. G.; Wong, J. P. S.; Abbatt, J. P.  
237 D.; Brune, W. H.; Ng, N. L.; Wright, J. P.; Croasdale, D. R.; Worsnop, D. R.; Davidovits, P.;  
238 Onasch, T. B. Characterization of aerosol photooxidation flow reactors: heterogeneous  
239 oxidation, secondary organic aerosol formation and cloud condensation nuclei activity  
240 measurements. *Atmos Meas Tech* **2011**, *4* (3), 445-461.
- 241 (3) Lambe, A.; Massoli, P.; Zhang, X.; Canagaratna, M.; Nowak, J.; Daube, C.; Yan, C.; Nie,  
242 W.; Onasch, T.; Jayne, J.; Kolb, C.; Davidovits, P.; Worsnop, D.; Brune, W. Controlled nitric  
243 oxide production via O(<sup>1</sup>D) + N<sub>2</sub>O reactions for use in oxidation flow reactor studies. *Atmos.*  
244 *Meas. Tech.* **2017**, *10* (6), 2283-2298.
- 245 (4) Paatero, P.; Tapper, U. Positive Matrix Factorization - a Nonnegative Factor Model with  
246 Optimal Utilization of Error-Estimates of Data Values. *Environmetrics* **1994**, *5* (2), 111-126.
- 247 (5) Ulbrich, I. M.; Canagaratna, M. R.; Zhang, Q.; Worsnop, D. R.; Jimenez, J. L.  
248 Interpretation of organic components from Positive Matrix Factorization of aerosol mass  
249 spectrometric data. *Atmos Chem Phys* **2009**, *9* (9), 2891-2918.
- 250 (6) Canonaco, F.; Crippa, M.; Slowik, J. G.; Baltensperger, U.; Prevot, A. S. H. SoFi, an  
251 IGOR-based interface for the efficient use of the generalized multilinear engine (ME-2) for  
252 the source apportionment: ME-2 application to aerosol mass spectrometer data. *Atmos Meas*  
253 *Tech* **2013**, *6* (12), 3649-3661.
- 254 (7) Paatero, P.; Hopke, P. K. Discarding or downweighting high-noise variables in factor  
255 analytic models. *Analytica Chimica Acta* **2003**, *490* (1), 277-289.

256 (8) Zhang, Q.; Jimenez, J. L.; Canagaratna, M. R.; Ulbrich, I. M.; Ng, N. L.; Worsnop, D. R.;  
257 Sun, Y. L. Understanding atmospheric organic aerosols via factor analysis of aerosol mass  
258 spectrometry: a review. *Anal Bioanal Chem* **2011**, *401* (10), 3045-3067.

259 (9) Paatero, P. The Multilinear Engine—A Table-Driven, Least Squares Program for Solving  
260 Multilinear Problems, Including the n-Way Parallel Factor Analysis Model. *J Comput Graph*  
261 *Stat* **1999**, *8* (4), 854-888.

262 (10) Canagaratna, M. R.; Jayne, J. T.; Jimenez, J. L.; Allan, J. D.; Alfarra, M. R.; Zhang, Q.;  
263 Onasch, T. B.; Drewnick, F.; Coe, H.; Middlebrook, A.; Delia, A.; Williams, L. R.;  
264 Trimborn, A. M.; Northway, M. J.; DeCarlo, P. F.; Kolb, C. E.; Davidovits, P.; Worsnop, D.  
265 R. Chemical and microphysical characterization of ambient aerosols with the aerodyne  
266 aerosol mass spectrometer. *Mass Spectrom Rev* **2007**, *26* (2), 185-222.

267 (11) Jimenez, J. L.; Jayne, J. T.; Shi, Q.; Kolb, C. E.; Worsnop, D. R.; Yourshaw, I.; Seinfeld,  
268 J. H.; Flagan, R. C.; Zhang, X.; Smith, K. A.; Morris, J. W.; Davidovits, P. Ambient aerosol  
269 sampling using the Aerodyne Aerosol Mass Spectrometer. *J Geophys Res Atmos* **2003**, *108*  
270 (D7), 8425.

271 (12) Ter Halle, A.; Jeanneau, L.; Martignac, M.; Jardé, E.; Pedrono, B.; Brach, L.; Gigault, J.  
272 Nanoplastic in the North Atlantic Subtropical Gyre. *Environmental Science & Technology*  
273 **2017**, *51* (23), 13689-13697.

274 (13) Shin, T.; Hajima, O.; Chuichi, W.; Tsuge, S.; Ohtani, H.; Watanabe, C. Pyrograms and  
275 thermograms of 163 high polymers, and MS data of the major pyrolyzates. *Pyrolysis-GC/MS*  
276 *Data Book of Synthetic Polymers* **2011**, 7-335.

277 (14) Zhang, Q.; Alfarra, M. R.; Worsnop, D. R.; Allan, J. D.; Coe, H.; Canagaratna, M. R.;  
278 Jimenez, J. L. Deconvolution and quantification of hydrocarbon-like and oxygenated organic  
279 aerosols based on aerosol mass spectrometry. *Environ Sci Technol* **2005**, *39* (13), 4938-4952.

- 280 (15) Shah, R. U.; Robinson, E. S.; Gu, P.; Robinson, A. L.; Apte, J. S.; Presto, A. A. High-  
281 spatial-resolution mapping and source apportionment of aerosol composition in Oakland,  
282 California, using mobile aerosol mass spectrometry. *Atmos Chem Phys* **2018**, *18* (22), 16325-  
283 16344.
- 284 (16) Liu, K.; Wang, X.; Fang, T.; Xu, P.; Zhu, L.; Li, D. Source and potential risk assessment  
285 of suspended atmospheric microplastics in Shanghai. *Sci Total Environ* **2019**, *675*, 462-471.
- 286 (17) Asrin, N. R. N.; Dipareza, A. Microplastics in ambient air (case study: Urip Sumoharjo  
287 street and Mayjend Sungkono street of Surabaya City, Indonesia). *J Adv Res Appl Sci* **2019**,  
288 *6*, 54-57.
- 289 (18) Dehghani, S.; Moore, F.; Akhbarizadeh, R. Microplastic pollution in deposited urban  
290 dust, Tehran metropolis, Iran. *Environ Sci Pollut Res* **2017**, *24* (25), 20360-20371.
- 291 (19) Liu, K.; Wu, T.; Wang, X.; Song, Z.; Zong, C.; Wei, N.; Li, D. Consistent Transport of  
292 Terrestrial Microplastics to the Ocean through Atmosphere. *Environ Sci Technol* **2019**, *53*  
293 (18), 10612-10619.
- 294 (20) Liu, C.; Li, J.; Zhang, Y.; Wang, L.; Deng, J.; Gao, Y.; Yu, L.; Zhang, J.; Sun, H.  
295 Widespread distribution of PET and PC microplastics in dust in urban China and their  
296 estimated human exposure. *Environ Int* **2019**, *128*, 116-124.
- 297
